# Supplementary material
Source: publisher figshare collection journal article supplement (https://tandf.figshare.com/ndownloader/files/40909038)
Supplement: Supplementary file 1 [file 40909038]

**Table S1. Effect of *P. indica* on biological characteristics of wheat seedlings.**

| **Treat** | **Plant height/cm** | **Leaf width/cm** | **Root length/cm** | **Lateral root number** | **SPAD** | **Shoot weight/g** | **Root weight/g** | **Dry shoot weight/g** | **Dry root weight/g** |
| --- | --- | --- | --- | --- | --- | --- | --- | --- | --- |
| 0.25×105/mL | 11.90±0.33a | 3.13±0.56a | 7.07±1.33c | 4.50±0.33a | 25.5±3.41a | 0.61±0.05a | 0.32±0.04b | 0.09±0.01a | 0.06±0.01a |
| 0.50×105/mL | 12.40±1.20a | 2.86±0.11a | 7.77±0.33c | 4.50±1.33a | 26.5±5.62a | 0.60±0.11a | 0.36±0.09b | 0.09±0.01a | 0.06±0.02a |
| 0.75×105/mL | 13.95±3.33b | 3.09±0.58a | 10.49±1.22b | 4.53±0.33a | 31.5±4.33b | 0.80±0.07b | 0.37±0.11a | 0.10±0.03a | 0.07±0.01a |
| 1.00×105/mL | 13.95±2.14b | 3.25±0.69a | 9.62±0.28b | 4.80±0.33a | 30.4±2.33b | 0.82±0.22b | 0.41±0.15a | 0.11±0.02a | 0.07±0.01a |
| 1.25×105/mL | 13.98±3.33b | 3.12±0.33a | 8.54±1.11a | 4.91±1.12a | 29.1±3.47b | 0.75±0.23b | 0.44±0.09a | 0.11±0.02a | 0.08±0.02a |
| CK | 11.70±1.12a | 2.93±0.33a | 9.07±0.33a | 4.65±0.45a | 23.6±2.32a | 0.64±0.08a | 0.43±0.13a | 0.10±0.02a | 0.07±0.02a |

Data in the table are means of three replicates (with twenty plants per point). Different lowercase letters denote significant differences between different treatments.
